# Supplementary material for: Computational insight into a new family of functionalized tetrazole-N-oxides as high-energy density materials
Source: Royal Society of Chemistry journal article supplement (doi:10.1039/c9nj04524d), 2019-01-01
Supplement: c9nj04524d1.pdf [file c9nj04524d1.pdf]

# Computational insight into a new family of functionalized tetrazole-N-oxides as high-energy density materials

Piao He<sup>1\*</sup>, Jingjie Han<sup>1</sup>, Jinting Wu<sup>2</sup>, Haozheng Mei<sup>3</sup>, Jianguo Zhang<sup>3</sup>

## Table of Contents

1. Optimized parameters
2. HOMO-LUMO and energy gap
3. Thermodynamic parameters
4. Calculations description
5. References

## 1. Optimized parameters

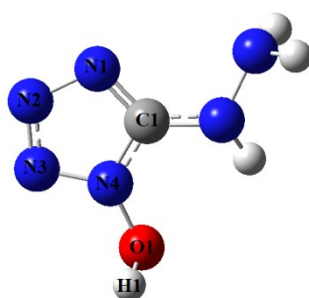

Figure S1 Optimized geometry of compound 1

Table S1 Selected optimized parameters of tetrazole N-oxides 1-10

| Bond length/angles <sup>a</sup> | 1     | 2     | 3     | 4     | 5     | 6     | 7     | 8     | 9     | 10    |
|---------------------------------|-------|-------|-------|-------|-------|-------|-------|-------|-------|-------|
| C1-N1                           | 1.317 | 1.358 | 1.416 | 1.349 | 1.325 | 1.352 | 1.339 | 1.322 | 1.322 | 1.315 |
| N1-N2                           | 1.370 | 1.364 | 1.440 | 1.357 | 1.349 | 1.347 | 1.298 | 1.357 | 1.366 | 1.371 |
| N2-N3                           | 1.282 | 1.266 | 1.450 | 1.281 | 1.303 | 1.273 | 1.324 | 1.288 | 1.279 | 1.281 |
| N3-N4                           | 1.358 | 1.355 | 1.429 | 1.367 | 1.327 | 1.349 | 1.312 | 1.345 | 1.360 | 1.359 |
| N4-C1                           | 1.354 | 1.372 | 1.287 | 1.320 | 1.348 | 1.354 | 1.344 | 1.343 | 1.345 | 1.348 |
| N-O                             | 1.370 | 1.354 | 1.451 | 1.364 | 1.362 | 1.341 | 1.352 | 1.362 | 1.363 | 1.365 |
| N1-N2-N3                        | 112.4 | 108.2 | 106.5 | 105.4 | 111.2 | 107.9 | 116.4 | 110.7 | 111.5 | 112.0 |
| N2-N3-N4                        | 104.7 | 107.3 | 106.4 | 111.7 | 105.6 | 107.3 | 104.7 | 105.5 | 105.4 | 105.2 |

\*Corresponding authors: Piao He, E-mail: piaohe@csu.edu.cn

|             |       |       |       |       |       |       |       |       |       |       |
|-------------|-------|-------|-------|-------|-------|-------|-------|-------|-------|-------|
| O-N-C1(N)   | 126.0 | 126.0 | 104.1 | 125.9 | 129.8 | 128.8 | 122.7 | 126.7 | 125.9 | 126.4 |
| H-O-N       | 105.6 | 106.3 | 102.5 | 105.9 | 105.0 | 102.1 | 104.3 | 105.7 | 105.9 | 105.8 |
| N1-N2-N3-N4 | 2.2   | 0.8   | 13.3  | 2.1   | 0.0   | 1.7   | 0.0   | 1.3   | 1.6   | 2.1   |
| O-N-N-N     | 170.9 | 169.0 | 97.5  | 172.1 | 179.3 | 172.5 | 179.7 | 175.7 | 173.4 | 172.1 |
| N-N-O-H     | 76.1  | 115.6 | 110.0 | 70.5  | 176.0 | 145.8 | 1.2   | 58.8  | 66.9  | 80.8  |

a Bond length (Å), Bond angle (°), Dihedral angle (°).

### Cartesian coordinates of optimized geometry

#### Compound 1

SCF energy = -444.2148905 hartree

ZPE = 0.083869 hartree

| Atom | X           | Y           | Z           |
|------|-------------|-------------|-------------|
| N    | -1.32366900 | -1.53574300 | 0.01556700  |
| N    | 1.48593700  | 0.53675400  | -0.12046300 |
| C    | 0.29660900  | -0.13585800 | -0.04841600 |
| N    | 0.04183000  | -1.42884400 | -0.02952700 |
| N    | -1.90419100 | -0.39230400 | 0.04042800  |
| H    | 1.46011300  | 1.48250900  | 0.24458700  |
| N    | -0.89317000 | 0.51176400  | -0.04151100 |
| O    | -1.07655500 | 1.85834800  | 0.13345100  |
| H    | -1.48513400 | 2.17571700  | -0.68617400 |
| N    | 2.66249800  | -0.21222500 | 0.03436600  |
| H    | 3.36298400  | 0.12027100  | -0.61541800 |
| H    | 3.01018100  | -0.18595800 | 0.98787400  |

#### Compound 2

SCF energy = -593.4187764 hartree

ZPE = 0.069315 hartree

| Atom | X | Y | Z |
|------|---|---|---|
|------|---|---|---|

|   |             |             |             |
|---|-------------|-------------|-------------|
| N | 1.85686200  | 1.51579900  | -0.00637200 |
| N | -0.85273800 | -0.78241800 | -0.01156000 |
| C | 0.22075500  | -0.03187400 | -0.00341600 |
| N | 0.50984500  | 1.29514000  | -0.00362000 |
| H | -0.17633900 | 2.03790800  | 0.02186900  |
| N | 2.44335300  | 0.39301500  | -0.02234400 |
| N | 1.48464700  | -0.56414800 | -0.05031900 |
| O | 1.81023900  | -1.86344000 | 0.14905700  |
| H | 1.60945900  | -2.32547700 | -0.68066600 |
| N | -2.05713200 | -0.09054700 | 0.00248300  |
| O | -3.05617200 | -0.77738300 | -0.02241900 |
| O | -2.06050600 | 1.15468700  | 0.03853900  |

### Compound 3

SCF energy = -445.4244743 hartree

ZPE = 0.107552 hartree

| Atom | X           | Y           | Z           |
|------|-------------|-------------|-------------|
| N    | 1.98223700  | -1.15351500 | 0.10428700  |
| H    | 1.99286600  | -2.01774000 | 0.62516900  |
| C    | 0.74750800  | -0.63738900 | -0.14140800 |
| N    | 0.63759700  | 0.74096200  | -0.45087500 |
| H    | 2.67608100  | -0.47280300 | 0.37829300  |
| N    | -0.35402100 | -1.30310000 | -0.18136300 |
| N    | 1.14019900  | 1.56917200  | 0.58545200  |
| H    | 1.33033200  | 2.48115600  | 0.18668200  |
| H    | 0.43715100  | 1.67296500  | 1.31760400  |
| N    | -1.40170300 | -0.35726400 | -0.40530000 |
| N    | -0.75841000 | 0.88945400  | -0.77337000 |
| H    | -0.80929100 | 0.89412200  | -1.78952300 |
| O    | -1.98751300 | -0.15938300 | 0.90759800  |

H -2.93337700 -0.15824900 0.71762100

#### Compound 4

SCF energy = -742.2997777 hartree

ZPE = 0.108703 hartree

| Atom | X           | Y           | Z           |
|------|-------------|-------------|-------------|
| N    | 3.14685000  | -1.38468400 | 0.01787700  |
| N    | 0.22354200  | 0.51680600  | -0.00476800 |
| H    | 0.15373300  | 1.52577000  | 0.03803600  |
| C    | 1.45799400  | -0.05897600 | -0.00294700 |
| N    | 1.78040100  | -1.33900300 | 0.01749400  |
| N    | 3.66164100  | -0.21135200 | 0.01359200  |
| N    | 2.60916200  | 0.64416900  | -0.03772500 |
| O    | 2.72595700  | 1.99697600  | 0.09734300  |
| H    | 3.16160700  | 2.30971000  | -0.71146800 |
| C    | -1.00296300 | -0.14350300 | -0.00681700 |
| N    | -1.00117200 | -1.47186900 | -0.01793300 |
| H    | -0.12223700 | -1.98243000 | -0.00537500 |
| H    | -1.91166400 | -1.91731900 | -0.02166500 |
| N    | -2.00055900 | 0.72695100  | -0.00045300 |
| N    | -3.30075100 | 0.25368300  | 0.00242200  |
| O    | -4.16042800 | 1.11261900  | 0.02248700  |
| O    | -3.54620600 | -0.96756500 | -0.01664000 |

#### Compound 5

SCF energy = -649.8139332 hartree

ZPE = 0.092732 hartree

| Atom | X           | Y           | Z          |
|------|-------------|-------------|------------|
| N    | -2.88829700 | -0.14552800 | 0.01623200 |
| N    | -1.01324100 | -1.41215700 | 0.02325500 |

|   |             |             |             |
|---|-------------|-------------|-------------|
| C | -0.66419800 | -0.15416000 | -0.00575700 |
| N | 1.76913000  | -0.58743100 | -0.01154200 |
| N | 2.89995800  | 0.10839500  | 0.01192900  |
| N | 2.54229600  | 1.36120300  | 0.03566000  |
| N | 1.19876500  | 1.48663300  | 0.02819600  |
| C | 0.71446400  | 0.25353900  | -0.00525500 |
| O | 1.79883700  | -1.94916500 | -0.05327400 |
| H | 0.85920500  | -2.22540600 | 0.00097400  |
| C | -1.85081100 | 0.65834500  | -0.01345900 |
| O | -2.36580800 | -1.43444900 | 0.03550500  |
| N | -1.89590700 | 2.00995500  | -0.08370400 |
| H | -1.03780900 | 2.52219800  | 0.06309700  |
| H | -2.77128500 | 2.47828100  | 0.08472500  |

### Compound 6

SCF energy = -781.9333488 hartree

ZPE = 0.083301 hartree

| Atom | X           | Y           | Z           |
|------|-------------|-------------|-------------|
| C    | -0.74244300 | 0.03579400  | -0.02087900 |
| N    | 1.69922600  | -0.54946600 | -0.22507700 |
| N    | 2.88575800  | 0.07235400  | -0.05790300 |
| N    | 2.64064200  | 1.27949000  | 0.26655700  |
| C    | 0.65761000  | 0.27727300  | 0.03482700  |
| O    | 1.68151600  | -1.79722500 | -0.71708800 |
| H    | 0.89702300  | -2.20795300 | -0.22923900 |
| N    | -1.61998700 | 1.16454000  | -0.16991900 |
| O    | -1.10559100 | 2.28069600  | 0.05798000  |
| O    | -2.77404800 | 1.01078900  | -0.51019600 |
| N    | -1.27047700 | -1.24937300 | 0.23617200  |
| O    | -2.45920700 | -1.47680100 | 0.18720300  |

|   |             |             |            |
|---|-------------|-------------|------------|
| O | -0.43013600 | -2.13848200 | 0.58707800 |
| N | 1.30373700  | 1.42387600  | 0.34648100 |
| H | 0.83942100  | 2.30779700  | 0.53156000 |

### Compound 7

SCF energy = -986.4594769 hartree

ZPE = 0.083793 hartree

| Atom | X           | Y           | Z           |
|------|-------------|-------------|-------------|
| N    | -1.66455200 | -0.77560300 | -0.02321800 |
| N    | -2.65161900 | 1.22310500  | -0.07940600 |
| C    | -0.77840100 | 0.22843400  | -0.06210600 |
| N    | -1.35700900 | 1.44131600  | -0.08960400 |
| N    | -2.77056500 | -0.09522000 | -0.03923300 |
| O    | -3.96861000 | -0.72173800 | -0.02112400 |
| H    | -4.61872900 | 0.00197600  | -0.02404600 |
| C    | 0.68555700  | -0.00533500 | -0.00864900 |
| N    | 1.45683100  | 1.33240400  | 0.14646400  |
| O    | 2.06140700  | 1.50718300  | 1.17800900  |
| O    | 1.36608000  | 2.06364300  | -0.81083700 |
| N    | 1.04357700  | -0.92444800 | 1.20924400  |
| O    | 0.44426500  | -0.66066600 | 2.22528300  |
| O    | 1.87313300  | -1.78317200 | 1.02558000  |
| N    | 1.27611600  | -0.69887400 | -1.28276300 |
| O    | 0.50946100  | -1.40048700 | -1.90143700 |
| O    | 2.44505400  | -0.48718100 | -1.50069800 |

### Compound 8

SCF energy = -705.1534016 hartree

ZPE = 0.110010 hartree

| Atom | X | Y | Z |
|------|---|---|---|
|------|---|---|---|

|   |             |             |             |
|---|-------------|-------------|-------------|
| N | -0.99148200 | 1.22469400  | -0.07362500 |
| N | -2.19145300 | 1.60124100  | -0.58455400 |
| N | -3.02540100 | 0.61942400  | -0.55995600 |
| N | 2.07637500  | -1.51571100 | -0.37889700 |
| N | 3.18072800  | -0.83052200 | -0.77978500 |
| N | 3.10976400  | 0.41597500  | -0.43627100 |
| C | -1.08801900 | -0.05052100 | 0.26144700  |
| C | -0.02070400 | -0.90351500 | 0.86958200  |
| H | -0.25896000 | -1.95828100 | 0.73193000  |
| H | 0.01323400  | -0.71025800 | 1.94821900  |
| C | 1.31641100  | -0.64657300 | 0.25355300  |
| N | 1.94859900  | 0.54532500  | 0.21240600  |
| N | -2.34080600 | -0.42137100 | -0.05081600 |
| O | 1.57600800  | 1.72849600  | 0.77283100  |
| H | 0.68694800  | 1.91468400  | 0.37802000  |
| O | -2.92242200 | -1.62630800 | 0.20673900  |
| H | -3.28029900 | -1.93338500 | -0.64172600 |

### Compound 9

SCF energy = -721.1912969 hartree

ZPE = 0.098294 hartree

| Atom | X           | Y           | Z           |
|------|-------------|-------------|-------------|
| N    | -0.02046700 | -0.92412100 | -0.36456600 |
| H    | -0.21914400 | -1.91260700 | -0.45252700 |
| N    | -3.11672500 | 0.62052900  | 0.29795500  |
| N    | -2.29216300 | 1.57780200  | 0.49885400  |
| N    | -1.00068200 | 1.17788100  | 0.30067600  |
| N    | 2.20144200  | -1.47284800 | 0.36160900  |
| N    | 3.35562800  | -0.76181600 | 0.47453300  |
| N    | 3.18359300  | 0.47585200  | 0.14828400  |

|   |             |             |             |
|---|-------------|-------------|-------------|
| C | -1.05331400 | -0.10057400 | -0.03195700 |
| C | 1.30665900  | -0.61972900 | -0.08202400 |
| N | 1.89514500  | 0.58499300  | -0.21805700 |
| N | -2.34973900 | -0.46093000 | -0.00765700 |
| O | 1.41606800  | 1.73792400  | -0.75604800 |
| H | 0.56574600  | 1.90396800  | -0.27091300 |
| O | -2.85637700 | -1.65930300 | -0.41649300 |
| H | -3.33643000 | -2.01991100 | 0.34623700  |

### Compound 10

SCF energy = -776.5196799 hartree

ZPE = 0.114408 hartree

| Atom | X           | Y           | Z           |
|------|-------------|-------------|-------------|
| N    | -2.80529100 | -0.31888100 | 0.02042600  |
| N    | -3.46580300 | 0.60382700  | 0.76873100  |
| N    | -2.60875800 | 1.52873300  | 0.99639600  |
| N    | -1.40708100 | 1.27910200  | 0.38398300  |
| C    | -1.55725200 | 0.12668800  | -0.23178300 |
| N    | 2.74480500  | 0.35760600  | -0.12711400 |
| N    | 3.51535800  | -0.25024800 | 0.80960600  |
| N    | 2.84407300  | -1.28140800 | 1.17426200  |
| N    | 1.63267400  | -1.36004400 | 0.54000000  |
| C    | 1.58573100  | -0.31805400 | -0.25914700 |
| N    | 0.61045600  | 0.04136800  | -1.17199000 |
| H    | 0.56508100  | 1.04080800  | -1.35429900 |
| N    | -0.63136500 | -0.55419800 | -0.97488800 |
| H    | -0.95848700 | -1.11858400 | -1.74597300 |
| O    | 3.03355300  | 1.58255100  | -0.66152100 |
| H    | 3.79619000  | 1.44236600  | -1.24379200 |
| O    | -3.41722500 | -1.39251400 | -0.56160700 |



H -3.50774300 -2.05768000 0.13879200

## 2. HOMO-LUMO and energy gap

**Table S2** HOMO-LUMO and energy gap of tetrazole N-oxides **1-10** (eV)

| Energy    | LUMO  | HOMO  | $\Delta E_{\text{LUMO-HOMO}}$ |
|-----------|-------|-------|-------------------------------|
| <b>1</b>  | -1.11 | -7.14 | 6.02                          |
| <b>2</b>  | -2.56 | -8.02 | 5.46                          |
| <b>3</b>  | -0.50 | -6.45 | 5.95                          |
| <b>4</b>  | -2.49 | -7.97 | 5.47                          |
| <b>5</b>  | -2.89 | -7.67 | 4.77                          |
| <b>6</b>  | -3.48 | -8.13 | 4.64                          |
| <b>7</b>  | -3.89 | -9.23 | 5.34                          |
| <b>8</b>  | -1.99 | -8.19 | 6.20                          |
| <b>9</b>  | -1.85 | -7.87 | 6.01                          |
| <b>10</b> | -1.23 | -7.68 | 6.45                          |

## 3. Thermodynamic parameters

**Table S3** Thermodynamic parameters of tetrazole N-oxides **1-10**

| Energy    | ZPE        | $U$        | $H$        | $G$        | $S$            | $C_v$          |
|-----------|------------|------------|------------|------------|----------------|----------------|
|           | (kcal/mol) | (kcal/mol) | (kcal/mol) | (kcal/mol) | (kcal/(mol·K)) | (kcal/(mol·K)) |
| <b>1</b>  | 52.62      | 57.31      | 57.91      | 32.62      | 84.79          | 26.34          |
| <b>2</b>  | 43.49      | 48.69      | 49.28      | 22.16      | 90.97          | 28.92          |
| <b>3</b>  | 67.48      | 72.32      | 72.91      | 47.60      | 84.88          | 29.30          |
| <b>4</b>  | 68.21      | 75.31      | 75.90      | 43.72      | 107.91         | 40.57          |
| <b>5</b>  | 58.19      | 64.28      | 64.87      | 35.80      | 97.51          | 35.77          |
| <b>6</b>  | 52.27      | 58.66      | 59.25      | 28.96      | 101.58         | 36.94          |
| <b>7</b>  | 52.58      | 61.37      | 61.961     | 25.61      | 121.91         | 47.65          |
| <b>8</b>  | 69.03      | 75.51      | 76.10      | 45.72      | 101.88         | 37.69          |
| <b>9</b>  | 61.68      | 68.09      | 68.68      | 38.70      | 100.57         | 37.7           |
| <b>10</b> | 71.79      | 79.39      | 79.98      | 46.48      | 112.37         | 43.34          |

#### 4. Calculations description

Density is one of the important parameters for an energetic material. The density was predicted by using an improved equation proposed by Politzer<sup>1</sup> referring to intermolecular interactions within the crystal as follows:

$$\rho = \alpha \left( \frac{M}{V(0.001)} \right) + \beta (v\sigma_{\text{Tot}}^2) + \gamma \quad (1)$$

Where M is molecular mass in g/molecule; V(0.001) is volume in cm<sup>3</sup>/molecule, which is average value of calculated molecular volumes by using a Monte Carlo integration embedded in Gaussian program<sup>2</sup>; The  $v\sigma_{\text{Tot}}^2$  is derived from the molecular electrostatic potential calculation, which is performed by using Multiwfn program<sup>3</sup>;  $\alpha$ ,  $\beta$  and  $\gamma$  are coefficients from the reference<sup>1</sup>.

The heat of formation is often used to evaluate the energy performance of energetic compounds. Here we give the atomization energies method<sup>4</sup> to calculate the heat of formation of gas-phase:

$$\Delta H_f(A_x B_y, 0K) = x\Delta H^0(A, 0K) + y\Delta H^0(B, 0K) - \sum D_0 \quad (2)$$

Where  $\Delta H^0$  is the heat of formation of isolated atoms;  $D_0$  is calculated atomization energies.

Then, the heat of formation was determined by deducting the enthalpy of sublimation either vaporization<sup>5, 6</sup> based on the Hess' law<sup>7</sup>.

$$\Delta H(\text{Solid}) = \Delta H(\text{Gas}) - \Delta H(\text{Sublimation}) \quad (3)$$

$$\Delta H(\text{Liquid}) = \Delta H(\text{Gas}) - \Delta H(\text{Vaporization}) \quad (4)$$

$$\Delta H(\text{Sublimation}) = a(\text{SA})^2 + b\sqrt{\sigma_{\text{Tot}}^2}v + c \quad (5)$$

$$\Delta H(\text{Vaporization}) = a\sqrt{\text{SA}} + b\sqrt{\sigma_{\text{Tot}}^2}v + c \quad (6)$$

Where (SA) is the molecular surface area for this structure,  $\sigma_{\text{Tot}}^2$  is described as an indicator of the variability of the electrostatic potential on the molecular surface, and  $v$  is the degree of balance between the positive and negative potentials on the molecular surface. And where  $a$ ,  $b$ , and  $c$  are fitting parameters.

**Table S4** The detailed parameters for calculating the heats of formation of tetrazole N-oxides **1-10**

|           | <sup>a</sup> E | <sup>b</sup> ZPE | <sup>c</sup> H <sub>corr</sub> | <sup>d</sup> SA | <sup>e</sup> σ <sup>2</sup> <sub>Tot</sub> | <sup>f</sup> v | <sup>g</sup> ΔH <sub>0K</sub> | <sup>h</sup> ΔH <sub>298K</sub> | <sup>i</sup> ΔH <sub>(Subimation)</sub> | <sup>j</sup> Δ <sub>f</sub> H <sub>298K(s)</sub> |
|-----------|----------------|------------------|--------------------------------|-----------------|--------------------------------------------|----------------|-------------------------------|---------------------------------|-----------------------------------------|--------------------------------------------------|
| <b>1</b>  | -444.2148      | 0.0838           | 0.0922                         | 139.0491        | 405.1134                                   | 0.2458         | 130.9563                      | 124.6687                        | 27.1964                                 | 97.4722                                          |
| <b>2</b>  | -593.4187      | 0.0693           | 0.0785                         | 149.6185        | 385.6064                                   | 0.1897         | 121.1890                      | 115.3509                        | 24.8084                                 | 90.5425                                          |
| <b>3</b>  | -445.4244      | 0.1075           | 0.1161                         | 142.8043        | 230.6029                                   | 0.2493         | 120.2681                      | 112.1036                        | 21.4625                                 | 90.6411                                          |
| <b>4</b>  | -742.2997      | 0.1087           | 0.1209                         | 190.9808        | 397.0834                                   | 0.1916         | 133.0656                      | 124.7770                        | 31.2132                                 | 93.5637                                          |
| <b>5</b>  | -649.8139      | 0.0927           | 0.1033                         | 171.8645        | 205.2510                                   | 0.2064         | 163.1335                      | 156.6771                        | 21.9519                                 | 134.7251                                         |
| <b>6</b>  | -781.9333      | 0.0833           | 0.0944                         | 173.1789        | 264.2107                                   | 0.1839         | 121.5714                      | 114.5975                        | 23.9454                                 | 90.6521                                          |
| <b>7</b>  | -986.4594      | 0.0837           | 0.0987                         | 203.6436        | 320.2922                                   | 0.0528         | 148.4166                      | 141.7303                        | 21.4434                                 | 120.2869                                         |
| <b>8</b>  | -705.1534      | 0.1100           | 0.1212                         | 187.9477        | 384.4316                                   | 0.1948         | 190.3370                      | 182.2184                        | 30.5493                                 | 151.6691                                         |
| <b>9</b>  | -721.1912      | 0.0982           | 0.1094                         | 183.1384        | 458.0306                                   | 0.1575         | 201.3868                      | 193.4236                        | 29.3825                                 | 164.0410                                         |
| <b>10</b> | -776.5196      | 0.1144           | 0.1274                         | 205.1156        | 415.0451                                   | 0.1809         | 234.8165                      | 225.9912                        | 33.4316                                 | 192.5596                                         |

<sup>a</sup> E is electronic energies (hartree), <sup>b</sup> ZPE is zero-point correction (hartree), <sup>c</sup> H<sub>corr</sub> is thermal correction to enthalpy (hartree), <sup>d</sup> SA is the molecular surface area for this structure (Å<sup>2</sup>), <sup>e</sup> σ<sup>2</sup><sub>Tot</sub> is an indicator of the variability of the electrostatic potential ((kcal/mol)<sup>2</sup>), <sup>f</sup> v is the degree of balance, <sup>g</sup> ΔH<sub>0K</sub> is heats of formation for gas at 0K (kcal/mol), <sup>h</sup> ΔH<sub>298K</sub> is heats of formation for gas at 298K (kcal/mol), <sup>i</sup> ΔH<sub>(Subimation)</sub> is the enthalpy of sublimation (kcal/mol), <sup>j</sup> Δ<sub>f</sub>H<sub>298K(s)</sub> is the heat of formation for solid at 298K (kcal/mol).

The detonation velocity and detonation pressure are the key parameters to assess the potential of an energetic material and were predicted by Empirical Kamlet-Jacobs equations<sup>8</sup>:

$$V_D = 1.01 \left( N \bar{M}^{-\frac{1}{2}} Q^{\frac{1}{2}} \right)^{\frac{1}{2}} (1 + 1.30\rho) \quad (7)$$

$$P_D = 1.558 \rho^2 N \bar{M}^{-\frac{1}{2}} Q^{\frac{1}{2}} \quad (8)$$

Where  $V_D$  is detonation velocity (km/s);  $P_D$  is detonation pressure (GPa);  $N$  is moles of detonation gases per gram explosive;  $\bar{M}$  is average molecular weight of these gases;  $Q$  is heat of detonation (cal/g); and  $\rho$  is the theoretical density (g/cm<sup>3</sup>) here.

In order to investigate the sensitivity of explosives, the property-structure relation method “generalized interaction property function” (GIPF)<sup>9</sup> was used to estimate the impact sensitivity  $h_{50\%}$ . Here we give introduced Model 4 summarized below:

$$\text{Model 4: } h_{50\%} = 27.8 + 0.1135 \times \exp^{\frac{Q_d}{R T}} [ - (2.6479 \text{ g/kJ} \times [Q_d - 6.9496 \text{ kJ/g}])] \quad (9)$$

**Table S5** The calculated  $h_{50\%}$  based on the model 4 of tetrazole N-oxides **1-10** common HEDMs

| $h_{50\%}$ | <b>1</b> | <b>2</b> | <b>3</b> | <b>4</b> | <b>5</b> | <b>6</b> | <b>7</b> | <b>8</b> | <b>9</b> | <b>10</b> | <b>TNT</b> | <b>RDX</b> | <b>HMX</b> |
|------------|----------|----------|----------|----------|----------|----------|----------|----------|----------|-----------|------------|------------|------------|
| Model 4    | 28       | 28       | 29       | 28       | 28       | 29       | 28       | 28       | 28       | 28        | 113        | 39         | 41         |
| Exp.       | --       | --       | --       | --       | --       | --       | --       | --       | --       | --        | 98         | 28         | 32         |

## 5. References

1. P. Politzer, J. Martinez, J. S. Murray, M. C. Concha and A. Toro-Labbé, *Mol. Phys.*, 2009, **107**, 2095-2101.
2. M. J. Frisch, G. W. Trucks, H. B. Schlegel, G. E. Scuseria, M. A. Robb, J. R. Cheeseman, G. Scalmani, V. Barone, B. Mennucci and G. A. Petersson, *GAUSSIAN 09*, (2009) Gaussian, Inc., Wallingford CT.
3. T. Lu, *Multiwfn, version 1.4*: <http://multiwfn.codeplex.com/>.
4. L. A. Curtiss, K. Raghavachari, P. C. Redfern and J. A. Pople, *J. Chem. Phys.*, 1997, **106**, 1063-1066.
5. J. S. Murray and P. Politzer, *Quantitative Treatment of Solute/Solvent Interactions, Theoretical and Computational Chemistry*, Elsevier Scientific, Amsterdam, 1994.
6. P. Politzer, J. S. Murray, T. Brinck and P. Lane, *Immunoanalysis of Agrochemicals*, ACS Symp. Ser. 586, American Chemical Society, Washington, DC, 1994.
7. P. W. Atkins, *Physical Chemistry*, Oxford University Press, Oxford, 1982.
8. M. J. Kamlet and S. J. Jacobs, *J. Chem. Phys.*, 1968, **48**, 23-35.
9. B. M. Rice and J. J. Hare, *J. Phys. Chem. A*, 2002, **106**, 1770-1783.
